# Supplementary material
Source: publisher site journal article supplement (https://kjim.org/upload/media/kjim-2025-182-Supplementary-Table-2.pdf)
Supplement: Supplementary file 1 [file kjim-2025-182-Supplementary-Table-2.pdf]

**Supplementary Table 2. 90-day infection-related treatment failure in bacteremia patients according to the antibiotic duration**

| Characteristic                   | Treatment success<br>(n = 112) | 90-day infection-related<br>treatment failure (n = 15) | Total (n = 127) | <i>p</i> value |
|----------------------------------|--------------------------------|--------------------------------------------------------|-----------------|----------------|
| < 1 week of antibiotics therapy  | 4 (3.6)                        | 2 (13.3)                                               | 6 (4.7)         | 0.148          |
| < 2 weeks of antibiotics therapy | 12 (10.7)                      | 5 (33.3)                                               | 17 (13.4)       | 0.016          |
| < 3 weeks of antibiotics therapy | 44 (39.3)                      | 6 (40)                                                 | 50 (39.4)       | 0.958          |
| < 4 weeks of antibiotics therapy | 62 (55.4)                      | 10 (66.7)                                              | 72 (56.7)       | 0.406          |

Values are presented as number (%).
